# Supplementary material
Source: ML conference proceedings conference paper supplement (https://openreview.net/forum?id=dZvzVVa1Qh)
Supplement: supplementary_material [file func_noref.xlsx]

## Sheet: CodeBLEU Comparison
File	A - ice-score_gpt-4o_no-cot	B - ice-score_gpt-4o_no-cot	A - avg	B - avg
e4.py	1	2	1	2
e2.py	1	4	1	4
h10.py	0	1	0	1
e5.py	0	3	0	3
e6.py	2	2	2	2
m7.py	0	3	0	3
e7.py	3	4	3	4
e1.py	3	4	3	4
h6.py	0	3	0	3
m3.py	1	0	1	0
h1.py	0	1	0	1
h3.py	0	3	0	3
m8.py	0	3	0	3
h4.py	0	2	0	2
e3.py	0	1	0	1
m6.py	0	2	0	2
m1.py	1	0	1	0
m4.py	0	3	0	3
m5.py	1	0	1	0
h5.py	1	2	1	2
Average	0.7	2.15	0.7	2.15
