# Supplementary material
Source: ML conference proceedings conference paper supplement (https://openreview.net/forum?id=dZvzVVa1Qh)
Supplement: supplementary_material [file func_noref.xlsx]

## Sheet: CodeBLEU Comparison
File	A - ice-score_gpt-4o_no-cot	B - ice-score_gpt-4o_no-cot	A - avg	B - avg
1.py	3	3	3	3
2.py	3	3	3	3
3.py	3	3	3	3
4.py	2	3	2	3
5.py	0	3	0	3
6.py	3	3	3	3
7.py	3	4	3	4
8.py	3	3	3	3
9.py	3	4	3	4
10.py	3	4	3	4
11.py	3	3	3	3
12.py	3	4	3	4
13.py	3	4	3	4
14.py	2	4	2	4
15.py	2	4	2	4
16.py	3	4	3	4
17.py	0	3	0	3
18.py	3	3	3	3
19.py	3	3	3	3
20.py	3	4	3	4
21.py	4	4	4	4
22.py	3	4	3	4
23.py	3	4	3	4
24.py	3	4	3	4
25.py	3	3	3	3
26.py	4	4	4	4
27.py	3	4	3	4
28.py	3	4	3	4
29.py	3	4	3	4
30.py	3	4	3	4
31.py	3	3	3	3
32.py	3	3	3	3
33.py	3	3	3	3
34.py	3	3	3	3
35.py	4	0	4	0
36.py	4	4	4	4
37.py	0	4	0	4
38.py	0	0	0	0
39.py	4	3	4	3
40.py	3	3	3	3
41.py	3	4	3	4
42.py	3	3	3	3
43.py	3	3	3	3
44.py	3	0	3	0
45.py	3	4	3	4
46.py	0	3	0	3
47.py	2	3	2	3
48.py	3	4	3	4
49.py	3	3	3	3
50.py	0	3	0	3
51.py	3	3	3	3
52.py	3	4	3	4
53.py	3	4	3	4
54.py	3	4	3	4
55.py	0	3	0	3
56.py	4	4	4	4
57.py	3	4	3	4
58.py	3	4	3	4
59.py	2	3	2	3
60.py	2	2	2	2
61.py	3	4	3	4
62.py	2	4	2	4
63.py	3	3	3	3
64.py	3	4	3	4
65.py	3	4	3	4
66.py	3	4	3	4
67.py	3	4	3	4
68.py	2	3	2	3
69.py	4	4	4	4
70.py	3	0	3	0
71.py	3	0	3	0
72.py	3	4	3	4
73.py	4	4	4	4
74.py	3	4	3	4
75.py	4	4	4	4
76.py	0	4	0	4
77.py	4	4	4	4
78.py	4	4	4	4
79.py	3	4	3	4
80.py	3	3	3	3
81.py	3	3	3	3
82.py	4	4	4	4
83.py	4	4	4	4
84.py	3	3	3	3
85.py	1	4	1	4
86.py	3	4	3	4
87.py	3	4	3	4
88.py	3	3	3	3
89.py	3	4	3	4
90.py	3	3	3	3
91.py	3	4	3	4
92.py	3	4	3	4
93.py	2	3	2	3
94.py	1	2	1	2
95.py	3	3	3	3
96.py	3	4	3	4
97.py	3	4	3	4
98.py	3	4	3	4
99.py	2	3	2	3
100.py	2	2	2	2
Average	2.74	3.37	2.74	3.37
