# Supplementary material
Source: ML conference proceedings conference paper supplement (https://openreview.net/forum?id=dZvzVVa1Qh)
Supplement: supplementary_material [file func_ref.xlsx]

## Sheet: CodeBLEU Comparison
File	A - ice-score_gpt-4o_no-cot	B - ice-score_gpt-4o_no-cot	A - avg	B - avg
1.py	1	4	1	4
2.py	3	3	3	3
3.py	3	3	3	3
4.py	1	4	1	4
5.py	2	3	2	3
6.py	1	3	1	3
7.py	3	4	3	4
8.py	3	3	3	3
9.py	0	4	0	4
10.py	2	4	2	4
11.py	3	3	3	3
12.py	3	3	3	3
13.py	3	4	3	4
14.py	3	4	3	4
15.py	2	3	2	3
16.py	2	3	2	3
17.py	3	4	3	4
18.py	3	3	3	3
19.py	2	3	2	3
20.py	3	3	3	3
21.py	4	4	4	4
22.py	0	4	0	4
23.py	3	0	3	0
24.py	3	4	3	4
25.py	0	0	0	0
26.py	3	4	3	4
27.py	3	3	3	3
28.py	3	4	3	4
29.py	4	3	4	3
30.py	1	4	1	4
31.py	2	3	2	3
32.py	3	3	3	3
33.py	4	4	4	4
34.py	3	3	3	3
35.py	3	0	3	0
36.py	4	3	4	3
37.py	3	3	3	3
38.py	3	0	3	0
39.py	4	4	4	4
40.py	4	3	4	3
41.py	3	4	3	4
42.py	3	3	3	3
43.py	3	4	3	4
44.py	0	3	0	3
45.py	4	4	4	4
46.py	0	3	0	3
47.py	2	2	2	2
48.py	3	3	3	3
49.py	3	4	3	4
50.py	3	4	3	4
51.py	0	0	0	0
52.py	3	3	3	3
53.py	3	4	3	4
54.py	3	4	3	4
55.py	2	0	2	0
56.py	0	4	0	4
57.py	3	4	3	4
58.py	0	3	0	3
59.py	2	4	2	4
60.py	2	3	2	3
61.py	0	3	0	3
62.py	3	4	3	4
63.py	3	4	3	4
64.py	3	4	3	4
65.py	0	3	0	3
66.py	3	4	3	4
67.py	3	3	3	3
68.py	1	3	1	3
69.py	3	3	3	3
70.py	2	0	2	0
71.py	3	0	3	0
72.py	2	4	2	4
73.py	3	3	3	3
74.py	3	4	3	4
75.py	3	4	3	4
76.py	1	3	1	3
77.py	3	4	3	4
78.py	4	4	4	4
79.py	1	3	1	3
80.py	4	3	4	3
81.py	4	3	4	3
82.py	1	4	1	4
83.py	4	4	4	4
84.py	2	0	2	0
85.py	1	3	1	3
86.py	3	3	3	3
87.py	3	4	3	4
88.py	2	0	2	0
89.py	3	4	3	4
90.py	3	3	3	3
91.py	3	0	3	0
92.py	3	3	3	3
93.py	3	3	3	3
94.py	1	0	1	0
95.py	3	4	3	4
96.py	4	4	4	4
97.py	3	3	3	3
98.py	2	4	2	4
99.py	2	3	2	3
100.py	0	0	0	0
Average	2.43	3.02	2.43	3.02
