# Supplementary material
Source: ML conference proceedings conference paper supplement (https://openreview.net/forum?id=dZvzVVa1Qh)
Supplement: supplementary_material [file func_ref.xlsx]

## Sheet: CodeBLEU Comparison
File	A - ice-score_gpt-4o_no-cot	B - ice-score_gpt-4o_no-cot	A - avg	B - avg
e4.py	4	0	4	0
e2.py	1	2	1	2
h10.py	0	0	0	0
e5.py	0	3	0	3
e6.py	0	0	0	0
m7.py	0	1	0	1
e7.py	2	3	2	3
e1.py	0	3	0	3
h6.py	0	3	0	3
m3.py	0	0	0	0
h1.py	0	2	0	2
h3.py	0	2	0	2
m8.py	0	3	0	3
h4.py	0	1	0	1
e3.py	0	0	0	0
m6.py	0	0	0	0
m1.py	0	0	0	0
m4.py	0	2	0	2
m5.py	0	1	0	1
h5.py	0	0	0	0
Average	0.35	1.3	0.35	1.3
