# Supplementary material
Source: ML conference proceedings conference paper supplement (https://openreview.net/forum?id=dZvzVVa1Qh)
Supplement: supplementary_material [file usefulness_noref.xlsx]

## Sheet: CodeBLEU Comparison
File	A - ice-score_gpt-4o_no-cot	B - ice-score_gpt-4o_no-cot	A - avg	B - avg
1.py	3	3	3	3
2.py	3	3	3	3
3.py	3	3	3	3
4.py	2	3	2	3
5.py	3	3	3	3
6.py	3	3	3	3
7.py	3	3	3	3
8.py	3	3	3	3
9.py	3	3	3	3
10.py	3	3	3	3
11.py	3	3	3	3
12.py	3	3	3	3
13.py	3	4	3	4
14.py	2	3	2	3
15.py	2	3	2	3
16.py	3	4	3	4
17.py	2	3	2	3
18.py	3	3	3	3
19.py	2	3	2	3
20.py	3	3	3	3
21.py	3	3	3	3
22.py	3	3	3	3
23.py	3	3	3	3
24.py	3	3	3	3
25.py	3	3	3	3
26.py	3	4	3	4
27.py	3	3	3	3
28.py	3	3	3	3
29.py	3	4	3	4
30.py	3	3	3	3
31.py	3	3	3	3
32.py	3	3	3	3
33.py	3	4	3	4
34.py	3	3	3	3
35.py	3	0	3	0
36.py	3	4	3	4
37.py	2	4	2	4
38.py	2	2	2	2
39.py	3	3	3	3
40.py	3	3	3	3
41.py	3	3	3	3
42.py	3	3	3	3
43.py	3	3	3	3
44.py	3	1	3	1
45.py	3	3	3	3
46.py	2	3	2	3
47.py	2	3	2	3
48.py	3	3	3	3
49.py	3	3	3	3
50.py	2	2	2	2
51.py	3	3	3	3
52.py	3	3	3	3
53.py	3	3	3	3
54.py	3	3	3	3
55.py	2	3	2	3
56.py	3	4	3	4
57.py	3	3	3	3
58.py	3	4	3	4
59.py	2	3	2	3
60.py	2	2	2	2
61.py	3	3	3	3
62.py	2	3	2	3
63.py	3	3	3	3
64.py	3	3	3	3
65.py	3	3	3	3
66.py	3	4	3	4
67.py	3	3	3	3
68.py	2	3	2	3
69.py	3	3	3	3
70.py	3	1	3	1
71.py	3	0	3	0
72.py	3	3	3	3
73.py	3	3	3	3
74.py	3	3	3	3
75.py	3	3	3	3
76.py	2	3	2	3
77.py	3	3	3	3
78.py	3	3	3	3
79.py	3	3	3	3
80.py	3	3	3	3
81.py	3	3	3	3
82.py	3	3	3	3
83.py	3	4	3	4
84.py	3	3	3	3
85.py	2	3	2	3
86.py	3	3	3	3
87.py	3	3	3	3
88.py	3	3	3	3
89.py	3	3	3	3
90.py	3	3	3	3
91.py	3	3	3	3
92.py	3	3	3	3
93.py	3	3	3	3
94.py	3	3	3	3
95.py	3	3	3	3
96.py	3	3	3	3
97.py	3	3	3	3
98.py	2	3	2	3
99.py	2	3	2	3
100.py	3	3	3	3
Average	2.81	2.98	2.81	2.98
