# Supplementary material
Source: ML conference proceedings conference paper supplement (https://openreview.net/forum?id=dZvzVVa1Qh)
Supplement: supplementary_material [file usefulness_noref.xlsx]

## Sheet: CodeBLEU Comparison
File	A - ice-score_gpt-4o_no-cot	B - ice-score_gpt-4o_no-cot	A - avg	B - avg
e4.py	2	2	2	2
e2.py	2	3	2	3
h10.py	1	2	1	2
e5.py	1	3	1	3
e6.py	2	2	2	2
m7.py	1	3	1	3
e7.py	3	3	3	3
e1.py	3	3	3	3
h6.py	1	3	1	3
m3.py	2	2	2	2
h1.py	0	2	0	2
h3.py	1	3	1	3
m8.py	1	3	1	3
h4.py	1	3	1	3
e3.py	2	1	2	1
m6.py	2	2	2	2
m1.py	2	2	2	2
m4.py	1	3	1	3
m5.py	2	2	2	2
h5.py	2	2	2	2
Average	1.6	2.45	1.6	2.45
